# Allowing for environmental effects in a management strategy evaluation for Japanese sardine

Felipe Hurtado-Ferro, Kazuhiko Hiramatsu, and Kunio Shirakihara

Hurtado-Ferro, F., Hiramatsu, K., and Shirakihara, K. 2010. Allowing for environmental effects in a management strategy evaluation for Japanese sardine. – *ICES Journal of Marine Science*, 67: 2012–2017.

The Japanese sardine (*Sardinops melanostictus*) is a valuable, but highly variable, resource. After record catches during the late 1980s, a 4-year recruitment failure, coupled with overfishing, resulted in severe stock depletion. TAC-based management was introduced in 1997, but the trend has not been reversed and the biomass is now 2 orders of magnitude below the value in 1987. Although a strong correlation exists between winter sea surface temperature (SST) in the nursery area and recruitment, uncertainty about future environmental effects is not explicitly considered in the management. We evaluate the robustness of three catch rules to environmental uncertainty, as captured by three stock–recruitment models (one without an environmental factor and two based on correlations between recruitment and SST for two datasets), in terms of the risk of further depletion, average biomass, and average catch: a constant fishing mortality (CF), a strategy that follows the Japanese guidelines (JG), and a more conservative strategy (ENV) that uses a temperature threshold as a proxy for regime shifts to switch between alternative catch rules. ENV and JG performed better than CF, with ENV displaying better performance in the long term, but differences were negligible in the short term.

**Keywords:** catch rules, environment-based management, Japanese sardine, management strategy evaluation.

Received 6 November 2009; accepted 21 June 2010; advance access publication 18 August 2010.

F. Hurtado-Ferro, K. Hiramatsu and K. Shirakihara: *Atmosphere and Ocean Research Institute, University of Tokyo, 5-1-5 Kashiwanoha, Kashiwa-shi, Chiba-ken 277-8564, Japan. Correspondence to F. Hurtado-Ferro: tel: +81 4 7136 6256; fax: +81 4 7136 6255; e-mail: felipehurtado@nenv.k.u-tokyo.ac.jp*

## Introduction

The Japanese sardine (*Sardinops melanostictus*) is a valuable, but highly variable, marine living resource. Because of its great abundance and commercial importance, the species has been extensively studied. Annual stock assessment reports have been made since 1996 and are available to the public from 2001 on. During the latter half of the 20th century, the stock has been characterized by extreme variability, with marked periods of depletion and recovery (Figure 1a). After reaching a minimum of ~20 000 t in 1970, the stock increased rapidly to a record high of more than 10 million tonnes in the mid-1980s. During the late 1980s and 1990s, the biomass dropped by 2 orders of magnitude, stabilizing at ~130 000 t during recent years (2002–2007; Nishida *et al.*, 2007).

The stock decline in the early 1990s resulted from four consecutive years of complete recruitment failure (1988–1991; Watanabe *et al.*, 1995), which corresponds to almost one generation (Figure 1b). When reproductive success improved again, the biomass had already been reduced by an order of magnitude and the stock could not rebuild itself. Moreover, the exploitation rates remained high and this ultimately resulted in the current depleted status of the stock. The cause of the recruitment failure has been widely debated, but most authors acknowledge the negative correlation between recruitment and sea surface temperature (SST) in the Kuroshio extension southern area (KESA), the nursery area of Japanese sardine (Yatsu *et al.*, 2005). It has also been recognized that this environmental index displays signs of recurrent regime shifts approximately every 20 years (Wada and

Jacobson, 1998; Yatsu *et al.*, 2005). Therefore, the causes of the failure are most likely natural, rather than anthropogenic.

Using catch quotas to manage fisheries resources is a relatively recent development in Japan. Although the 1970 United Nations Convention on the Law of the Sea established the right to declare 200 nautical mile exclusive economic zones, it was not until 1996 that Japan ratified this convention and approved the introduction of TACs. Since that time, marine resources have been managed according to the allowable biological catch (ABC) guidelines (FAJ-FRA, 2007), which describe different management strategies depending on data availability. Being a data-rich stock, the ABC for Japanese sardine is specified by a catch rule that defines the appropriate fishing mortality ( $F$ ) based on the biomass level. The actual ABC has been determined based on this catch rule and simulations to predict future states of the stock under scenarios of different levels of  $F$ . However, environmental variation and uncertainty are not explicitly considered in the assessment report, and the number of recruits per unit of spawner biomass (RPS) is assumed to remain unchanged from the mean of the past 10 years. Because recruitment has been relatively poor during this period, it could be argued that this assumption should result in conservative management. However, uncertainty and debate regarding the use of worst-case scenarios generated mistrust between decision-makers and shareholders, ultimately resulting in lengthy haggling and discussions on how to set quotas. This problem has resulted in a broad acceptance that worst-case scenarios should be avoided (Butterworth, 2007).

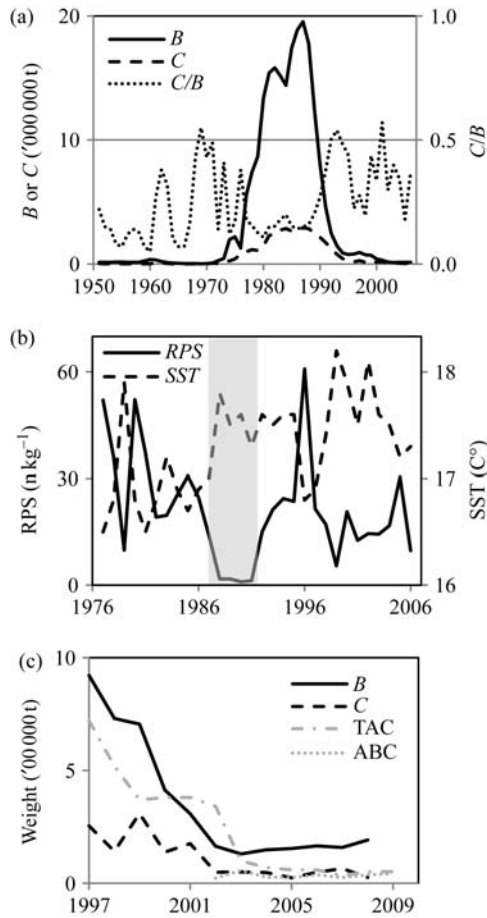

**Figure 1.** Population dynamics and management of Japanese sardine: (a) annual variations in total biomass ( $B$ ), catch ( $C$ ), and rate of exploitation ( $C/B$ ), 1951–2006 (data for 1951–1976 from Wada and Jacobson, 1998; for 1977–2006 from Nishida *et al.*, 2007); (b) recruits per unit of spawner biomass (RPS) and average SST in the KESA, 1976–2006 (grey band illustrates the 4-year recruitment failure; data from Nishida *et al.*, 2007); and (c) annual values of total biomass ( $B$ ), TAC, ABC, and actual catch ( $C$ ), since the introduction of TACs in 1996 (courtesy of Toshio Katsukawa).

Although the ABC is not strictly based on a worst-case scenario, these debates may have resulted in the undesirable effect of setting quotas continuously higher than recommended (Figure 1c).

The incorporation of environmental factors into fisheries management has recently gained attention in various fisheries, including those on small pelagic fish (De Oliveira and Butterworth, 2005; Barange *et al.*, 2009), squid (Agnew *et al.*, 2002), and pollock (A’mar *et al.*, 2009). However, the main research focus has generally been on the prediction of future recruitment, rather than on adjusting the catch rule used in management. This approach presents the limitation that it requires good predictions of the relevant environmental factor (De Oliveira and Butterworth, 2005), although simulation studies have demonstrated that incorporating environmental factors directly in management can reduce risks and increase yields (Basson, 1999).

Using a simplified management strategy evaluation framework (Smith *et al.*, 1999), we constructed a population model and explored the performance of different catch rules under the condition of uncertainty about environmental variability, with the

aim to help bridge the gap between assessment and management and to provide managers with tools that cope with these sources of uncertainty. Importantly, it was not our purpose to search for the optimal management strategy, but to provide a general evaluation of potential management strategies across a range of possible environmental effects on recruitment.

**Methods**

Stock data from 1976 to 2006 were taken from Nishida *et al.* (2007). SST data were obtained from two sources: the Japanese Meteorological Agency (JMA), as reported in Yatsu *et al.* (2005); and the British Atmospheric Data Centre Ukmo-HadISST database (BADC, 2009). Following Yatsu *et al.* (2005), we used the average SST during winter (January to March) on the KESA nursery grounds (31–35°N and 150–164°E; original data had the form of monthly SST averages for  $1^\circ \times 1^\circ$  blocks), 1950–2007.

The population was represented by an age-structured model. Recruitment was modelled using a generalized Ricker stock–recruitment model that allowed for environmental effects (Basson, 1999):

$$\ln RPS = \alpha + \beta S + \gamma E + \varepsilon, \tag{1}$$

where  $\alpha$ ,  $\beta$ , and  $\gamma$  are the parameters, RPS the recruits per spawner,  $S$  the spawning-stock biomass (SSB),  $E$  the environmental covariate (i.e. SST), and  $\varepsilon$  a normally distributed error, with standard deviation  $\sigma$ . In the parameter estimation, environmental data were used from either JMA or BADC separately, thus providing three different sets of recruitment parameters (Table 1). AIC was used as a criterion for model selection.

Spawner-stock biomass in year  $t$  ( $S_t$ ) is given by summing over age groups ( $a$ ):

$$S_t = \sum_{a=1}^5 N_{a,t} w_{a,t} g_a, \tag{2}$$

where  $N_{a,t}$  is the number of fish,  $w_{a,t}$  the average body weight, and  $g_a$  the proportion of mature individuals (assumed constant; all data taken from Nishida *et al.*, 2007).

Based on the negative correlation between growth and stock size (Wada, 1988), weight-at-age was assumed a linear function of the stock biomass in the year before ( $B_{t-1}$ ):

$$w_{a,t} = m_a + p_a B_{t-1} + \varepsilon_a, \tag{3}$$

where  $m$  and  $p$  are the parameters, and  $\varepsilon$  is a normally distributed error with standard deviation  $\sigma$ . Parameters were estimated by linear regression (Table 2).

SST was simulated by randomizing historical data. Sardine abundance revealed favourable (1971–1987) and unfavourable (1951–1970 and 1988–2007) production regimes in response to environmental variations (Wada and Jacobson, 1998).

**Table 1.** Parameter values and AIC for the three Ricker recruitment models.

| Model/parameter               | $\alpha$ | $\beta$   | $\gamma$ | $\sigma_\varepsilon$ | AIC |
|-------------------------------|----------|-----------|----------|----------------------|-----|
| Without environmental effects | 3.61     | -0.000156 | -        | 1.27                 | 172 |
| Based on JMA                  | 30.19    | -0.000156 | -1.56    | 1.12                 | 161 |
| Based on BADC                 | 22.74    | -0.000156 | -1.14    | 1.20                 | 168 |

**Table 2.** Parameter estimates for the density-dependent weight-at-age model using linear regressions.

| Age class | $m_a$ | $p_a$    | $\sigma$ | $r^2$ | p-value |
|-----------|-------|----------|----------|-------|---------|
| 0         | 24.9  | -0.00074 | 8.66     | 0.27  | <0.01   |
| 1         | 57.8  | -0.00083 | 9.34     | 0.29  | <0.01   |
| 2         | 87.8  | -0.00164 | 10.45    | 0.56  | <0.001  |
| 3         | 109.3 | -0.00190 | 10.66    | 0.63  | <0.001  |
| 4         | 123.6 | -0.00173 | 13.34    | 0.48  | <0.001  |
| 5+        | 136.4 | -0.00153 | 12.39    | 0.45  | <0.001  |

The average winter SST for each year (1950–2007) was assigned to either favourable or unfavourable regimes, based on the year's reproductive success, as defined by Wada and Jacobson (1998). To generate environmental time-series of SST, regime shifts were assigned a probability  $p$  to occur in a given year and the SST values were drawn at random from the appropriate regime set. Because of the apparent bi-decadal nature of regime shifts,  $p$  was assigned a value of 0.05 and assumed constant across time, so that on average a regime shift would occur every 20 years. The procedure was applied independently to the JMA and BADC datasets.

The catch rules considered use of two data inputs, namely stock biomass and SST. SST is assumed to be measured without error, but stock biomass is estimated by adding a random error to the true biomass:

$$\hat{B}_t = B_t e^\varepsilon, \quad (4)$$

where  $\varepsilon$  is a normally distributed error, with standard deviation  $\sigma$ . Recruitment was estimated in the same way:

$$\hat{R}_t = R_t e^\varepsilon. \quad (5)$$

Using these two inputs, management follows one of the three pre-defined catch rules (Figure 2):

- (i) Constant  $F$  strategy (CF): a widely used basic management strategy that does not use any reference points (Hilborn and Walters, 1992);
- (ii) ABC according to the Japanese guidelines (JG): a feedback management strategy that uses three reference points (Nishida *et al.*, 2007), two for biomass ( $B_{\text{ban}} = 22\,000$  t and  $B_{\text{lim}} = 222\,000$  t) and one for fishing mortality ( $F_{\text{lim}} = 0.47$ );  $F_{\text{lim}}$  sets the maximum  $F$  allowed;  $B_{\text{lim}}$  acts as a threshold below which  $F$  decreases linearly until  $B_{\text{ban}}$  is reached, where the fishery is closed and  $F$  becomes zero (note that the definitions used in Japan differ from those used elsewhere);
- (iii) Environment-based rule (ENV): a modification of JG, based on an idea of King and McFarlane (2006), which uses the same three reference points in combination with an SST threshold that represents a switch between alternative states (set arbitrarily at  $17.1^\circ\text{C}$ , slightly above the midpoint between the averages for favourable and unfavourable regimes identified by Wada and Jacobson (1998)). If  $\text{SST} > \text{threshold}$ , the catch rule is modified by a factor  $\lambda = 0.6$ . This strategy is the most conservative one among the three, because  $F$  is reduced further when the environment is unfavourable.

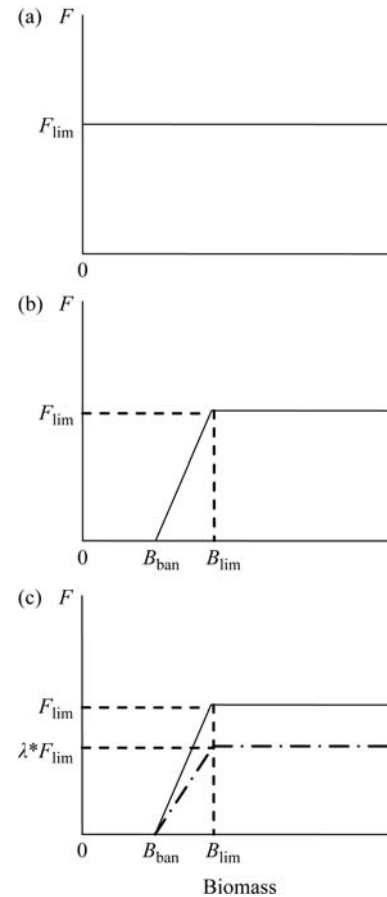

**Figure 2.** The three catch rules evaluated (see text for explanation): (a) constant fishing mortality (CF); (b) Japanese guidelines (JG); and (c) environmental-based management (ENV).

Management follows the sequence assessment  $\rightarrow$  catch rule  $\rightarrow$  quota setting  $\rightarrow$  catch. Quotas ( $TAC_t$ ) are calculated as

$$TAC_t = \hat{B}_t (1 - e^{-\hat{F}}) e^{-M/2}, \quad (6)$$

where  $\hat{B}_t$  is the estimated biomass,  $\hat{F}$  is estimated from the catch rule using  $\hat{B}_t$ , and  $M$  is the natural mortality rate ( $=0.4$ ). Quotas are assumed exhausted unless they are higher than 0.6 of the total biomass, the assumed maximum “catchable” fraction of the stock corresponding to the observed historical maximum (Nishida *et al.*, 2007); in such cases, we assumed that the quota would not be completely caught and the catch would correspond to 0.6 of the biomass.

The three sets of recruitment parameters, in combination with the three catch rules, represent nine possible scenarios. Using Monte Carlo simulations with 1000 iterations over a period of 20 years, each scenario was evaluated over a range of  $F_{\text{lim}}$  (0.05–1.8; for CF, the same range of  $F$ -values were evaluated as if  $F_{\text{lim}}$  is the target). A special remark must be made about the scenario of no environmental effects on recruitment and ENV. Although recruitment was not affected, SST time-series were still generated and ENV responded accordingly; this can be interpreted as a scenario where an inappropriate catch rule is implemented.

Depletion risk, mean biomass, and mean catch were selected as performance statistics. Depletion risk was defined as the probability of the stock falling below a specific level. Because the stock is already considered depleted (current biomass  $\approx 130\,000$  t; Nishida *et al.*, 2007), the depletion level was arbitrarily set at 100 000 t and should therefore be interpreted as the probability of further depletion. Mean biomass and mean catch should not be interpreted as predictors, but rather as indicators. To summarize the results, performance statistics were summed for each catch rule across recruitment scenarios, without weightings. For ease of visualization, profiles were drawn across values of  $F_{lim}$  for the three performance statistics. To evaluate relative performance, results were normalized by dividing by the value for the worst performing catch rule (i.e. CF).

**Results**

The environment had a greater influence on recruitment based on the JMA data (higher  $\gamma$ -value) than based on the BADC data, and the model fit was also better (lower  $\sigma$  and AIC; Table 1).

The performance statistics across different values of  $F_{lim}$  had the same shape for all catch rules, but their levels differed (Figure 3). Always, a higher biomass corresponded to a lower depletion risk, with biomass monotonically decreasing and risk increasing in a logistic fashion as  $F_{lim}$  increased, whereas catches

followed a curve with an optimum. Long-term (20 years) and short-term (5 years) responses were quite different.

In the long term, depletion risk revealed an acceleration of the increase between  $F_{lim} \approx 0.3-0.8$  for CF and  $F_{lim} \approx 0.7-1.2$  for both JG and ENV. ENV, being the most conservative catch rule, gave the best performance in preventing stock depletion, with JG following closely, whereas CF did considerably worse. The 50% depletion risk was reached at  $F_{lim} \approx 0.82, 0.75,$  and  $0.46$  for ENV, JG, and CF, respectively. Regardless of the strategy used, biomass reached high levels for low  $F_{lim}$  values, but then decreased rapidly in an exponential fashion. ENV again exhibited the best overall performance, followed closely by JG and, at a distance, by CF. The catch peaked for  $F_{lim}$  values between 0.2 and 0.3 for all three strategies, with JG doing slightly better than the others. The differences are more clearly visible when biomass and catch are plotted as normalized trajectories relative to the worst performing CF strategy. Discrepancies were greatest around  $F_{lim} \approx 1.2$ , where ENV and JG did a factor 4.5 and 3.5 better, respectively, than CF for biomass, and a factor 3 and 3.5 better, respectively, regarding catch.

The short-term results indicated no appreciable differences between ENV and JG, but these two exhibited lower depletion risk and higher biomass than the CF strategy. Catch trajectories were virtually the same for all three catch rules, peaking at  $F_{lim} \approx 0.7-0.8$ .

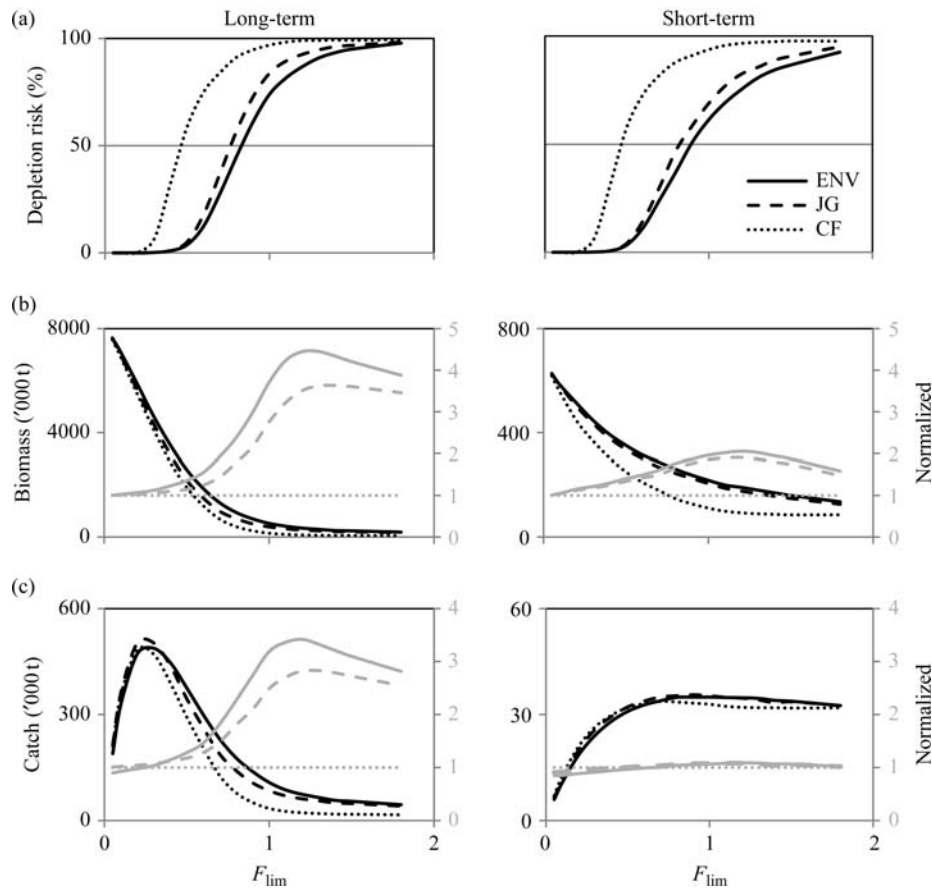

**Figure 3.** Profiles of the three long-term (20 years; left panels) and short-term (5 years; right panels) performance statistics (averaged over the three stock–recruitment scenarios) over the range of  $F_{lim}$  evaluated for the three catch rules (CF, JG, and ENV): depletion risk (top), biomass (middle), and catch (bottom). For biomass and catch, the normalized values (relative to CF results) are indicated by grey lines (right-hand scale).

The long-term performance statistics for the different catch rules when applied to the three stock–recruitment scenarios revealed no differences, as long as  $F_{lim} < 0.4$  (Figure 4). However, at higher values, ENV and JG did substantially better in all scenarios. Only for the JMA-based scenario did ENV outperform JG. The small differences between JG and ENV under no environmental effect can be attributed to “random” reductions in catches when ENV was used. The short-term performance statistics among stock–recruitment scenarios (not illustrated) were virtually indistinguishable and essentially resembled the average profiles given in Figure 3.

Overall, the conclusion is that long-term management outcomes are sensitive to environmental influences, with ENV producing the best results, because it represents the most conservative catch rule. ENV performance was not sensitive to small changes in  $\lambda$ .

## Discussion

Initially, we intended to compare the current quota-setting process side by side with the strategies evaluated. However, the differences among ABC, TAC, and actual catch made it impossible to discover clear decision rules in the current process—if there are any—and therefore, to make a comparison with rule-based strategies. The FAO (1995) precautionary approach paradigm demands that management procedures have clear objectives and involve prespecified decision rules that have been evaluated in advance, but it is only since 2009 that Japan has adopted new management procedures ensuring that quotas are set according to the ABC recommendations given by the Japanese Fisheries Agency.

Among the three catch rules evaluated, no “best one” could be identified clearly. As long as  $F_{lim}$  is kept low, the CF strategy may suffice, but this strategy performed poorly at higher  $F_{lim}$  values. The feedback control rules (JG and ENV) both performed more

satisfactory up to  $F_{lim} \approx 1$ . Although ENV does introduce additional undesirable complexities into the management process (e.g. quotas might have to be reduced from one year to the next if a regime shift occurs, even if the biomass is stable), this catch rule would reduce the depletion risk substantially compared with JG. Particularly when environmental influences are strong, as found for the Ricker relationship based on JMA data, ENV appears a good candidate for risk-averse management. This approach would be consistent with other studies on the use of environmental factors in managing fisheries (Agnew *et al.*, 2002; De Oliveira and Butterworth, 2005), but with the additional merit that it does not require good predictions of SST (Basson, 1999), but only an SST threshold.

The long-term performance of JG may be suboptimal, but it does not have the additional uncertainty about the appropriate  $\lambda$  to be used in ENV, which may make it a better choice for reaching short-term objectives. Setting short-term objectives in fisheries management tends to be regarded as asking for trouble, but may present a reasonable case when big economic considerations are at stake. For instance, in a scenario of high discount rates, high present values would be a strong incentive against conservation of the resource (Huppert, 1996). Butterworth and Bergh (1993) addressed this problem in a scenario of social insecurity and high resource variability of the South African fisheries for small pelagic fish. However, until it could be proven that the Japanese sardine would easily recover under good environmental conditions, regardless of fishing pressure, environmental variability remains the main source of uncertainty, especially because it should be considered a cause of high discount rates (Huppert, 1996). In this scenario, setting quotas based on a feedback strategy might produce a similar effect as a strategy based on switching between target species (Katsukawa and Matsuda, 2003), by

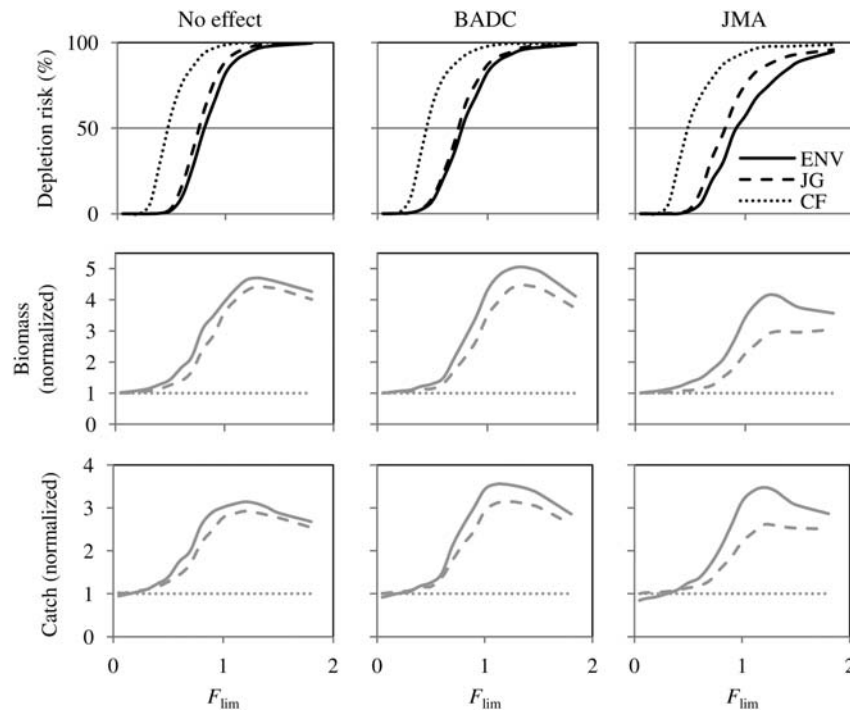

**Figure 4.** Long-term (20 years) profiles of performance statistics over the range of  $F_{lim}$  evaluated for each stock–recruitment scenario—no environmental effect, BADC-based and JMA-based—and for the three catch rules (CF, JG, and ENV): depletion risk (top), normalized (relative to CF results) biomass (middle), and catch (bottom).

ensuring resource sustainability, at the same time reducing economic uncertainty.

Because of its high natural variability and dependence on environmental factors, it is difficult to predict whether the Japanese sardine stock will recover soon or to estimate the probability of a recovery under any given catch rule, because any such prediction would be dependent on knowledge of the future environment. Nevertheless, we can still draw some conclusions relevant to stock recovery. Although there is no guarantee that the stock will recover if fishing mortality is reduced, high fishing mortality can apparently hinder stock recovery even under favourable environmental conditions. Although  $F_{lim}$  is currently set at 0.47, fishing mortality during the period 1998–2006 averaged 0.7 (Nishida *et al.*, 2007), which is closer to the short-term maximum catch level than to the long-term one. Regardless of the catch rule used for management, and given the difference between short-term and long-term performances of the catch rules, any stock recovery plan should rely on the setting of long-term rather than short-term objectives. As stated earlier, ENV seems a good candidate for risk-averse management, which is required for a stock recovery plan. However, the conflict between short-term and long-term objectives cannot be resolved directly through science (Smith *et al.*, 1999); it should therefore be addressed by managers.

### Acknowledgements

We acknowledge Sachihiko Itoh (The University of Tokyo) and Toshio Katsukawa (Mie University) for their invaluable collaboration and comments. We also thank colleagues in the Fish Population Dynamics Laboratory for stimulating discussions, Anthony D. M. Smith from CSIRO Australia for his constant help and attention, Niels Daan, Myron Peck, and Bjarte Bogstad for their useful and extensive comments on the manuscript, and the British Atmospheric Data Centre (BADC) for providing the environmental data used. The study was supported in part by a Monbukagakusho Scholarship awarded by the Japanese Government.

### References

- Agnew, D. J., Beddington, J. R., and Hill, S. L. 2002. The potential use of environmental information to manage squid stocks. *Canadian Journal of Fisheries and Aquatic Sciences*, 59: 1851–1857.
- A'mar, Z. T., Punt, A. E., and Dorn, M. W. 2009. The impact of regime shifts on the performance of management strategies for the Gulf of Alaska walleye pollock (*Theragra chalcogramma*) fishery. *Canadian Journal of Fisheries and Aquatic Sciences*, 66: 2222–2242.
- BADC. 2009. HadISST 1.1—Global Sea-Ice Coverage and SST (1870–Present), 2006 edn. UK Meteorological Office, Hadley Centre.
- Barange, M., Bernal, M., Cergole, M. C., Cubillos, L. A., Daskalov, G., de Moor, C., de Oliveira, J. A. A., *et al.* 2009. Current trends in the assessment and management of stocks. *In* Climate Change and Small Pelagic Fish. Ed. by D. Checkley, J. Alheit, Y. Oozeki, and C. Roy. Cambridge University Press. 372 pp.
- Basson, M. 1999. The importance of environmental factors in the design of management procedures. *ICES Journal of Marine Science*, 56: 933–942.
- Butterworth, D. S. 2007. Why a management procedure approach? Some positives and negatives. *ICES Journal of Marine Science*, 64: 613–617.
- Butterworth, D. S., and Bergh, M. O. 1993. The development of a management procedure for the South African anchovy resource. *Canadian Special Publication of Fisheries and Aquatic Sciences*, 120: 83–99.
- De Oliveira, J. A. A., and Butterworth, D. S. 2005. Limits to the use of environmental indices to reduce risk and/or increase yield in the South African anchovy fishery. *African Journal of Marine Science*, 27: 191–203.
- FAJ-FRA. 2007. Guidelines for Calculating ABC—2007 Version. Fisheries Agency of Japan and Fisheries Research Agency. 10 pp. (In Japanese).
- FAO. 1995. Precautionary Approach to Fisheries. Part 1: Guidelines on the Precautionary Approach to Capture Fisheries and Species Introductions. *FAO Fisheries Technical Paper*, 350. 52 pp.
- Hilborn, R., and Walters, C. J. 1992. *Quantitative Fisheries Stock Assessment: Choice, Dynamics and Uncertainty*. Kluwer Academic Publishers, Dordrecht.
- Huppert, D. D. 1996. Risk assessment, economics, and precautionary fishery management. *In* Precautionary Approach to Fisheries—Part 2: Scientific Papers. Ed. by FAO. *FAO Technical Papers*. 210 pp.
- Katsukawa, T., and Matsuda, H. 2003. Simulated effects of target switching on yield and sustainability of fish stocks. *Fisheries Research*, 60: 515–525.
- King, J. R., and McFarlane, G. A. 2006. A framework for incorporating climate regime shifts into the management of marine resources. *Fisheries Management and Ecology*, 13: 93–102.
- Nishida, H., Ishida, M., Noto, M., Kawabata, A., and Watanabe, C. 2007. Stock assessment for the Pacific stock of Japanese sardine *Sardinops melanostictus*. *In* Marine Fisheries Stock Assessment and Evaluation for Japanese Waters (Fiscal Year 2006/2007), pp. 11–44. Fisheries Agency of Japan and Fisheries Research Agency (in Japanese).
- Smith, A. D. M., Sainsbury, K. J., and Stevens, R. A. 1999. Implementing effective fisheries-management systems—management strategy evaluation and the Australian partnership approach. *ICES Journal of Marine Science*, 56: 967–979.
- Wada, T. 1988. Population dynamics on Japanese sardine, *Sardinops melanostictus*, caught by the domestic purse seine fishery in the waters off the coast of southeastern Hokkaido. *Bulletin of the Hokkaido Regional Fisheries Research Laboratory*, 52: 1–138.
- Wada, T., and Jacobson, L. D. 1998. Regimes and stock–recruitment relationships in Japanese sardine (*Sardinops melanostictus*), 1951–1995. *Canadian Journal of Fisheries and Aquatic Sciences*, 55: 2455–2463.
- Watanabe, Y., Zenitani, H., and Kimura, R. 1995. Population decline of the Japanese sardine *Sardinops melanostictus* owing to recruitment failures. *Canadian Journal of Fisheries and Aquatic Sciences*, 52: 1609–1616.
- Yatsu, A., Watanabe, T., Ishida, M., Sugisaki, H., and Jacobson, L. D. 2005. Environmental effects on recruitment and productivity of Japanese sardine *Sardinops melanostictus* and chub mackerel *Scomber japonicus* with recommendations for management. *Fisheries Oceanography*, 14: 263–278.
